# Supplementary material
Source: bioRxiv or medRxiv preprint supplement (https://www.biorxiv.org/highwire/filestream/54900/field_highwire_adjunct_files/1/136358-2.pdf)

# Add. file 2

a

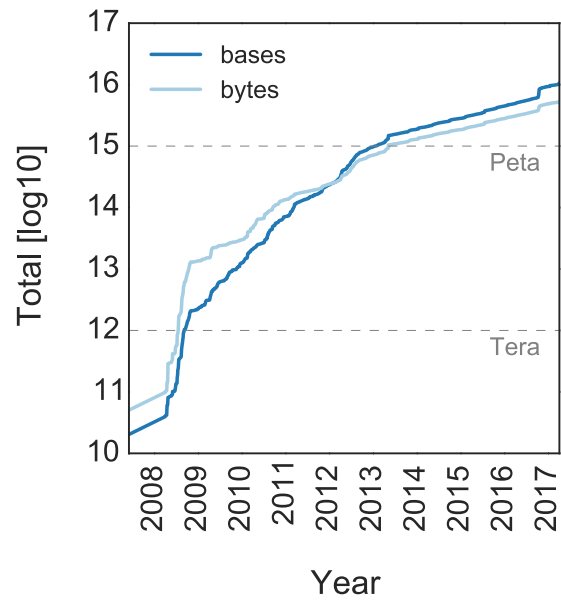

b

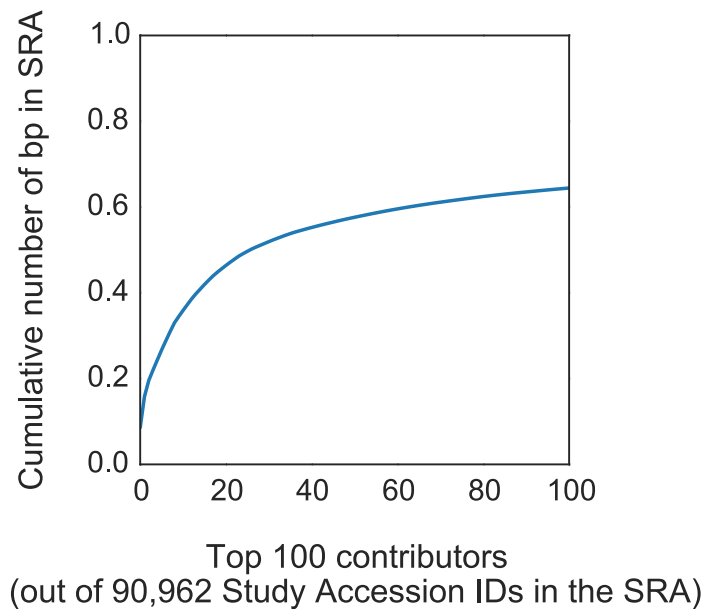

C

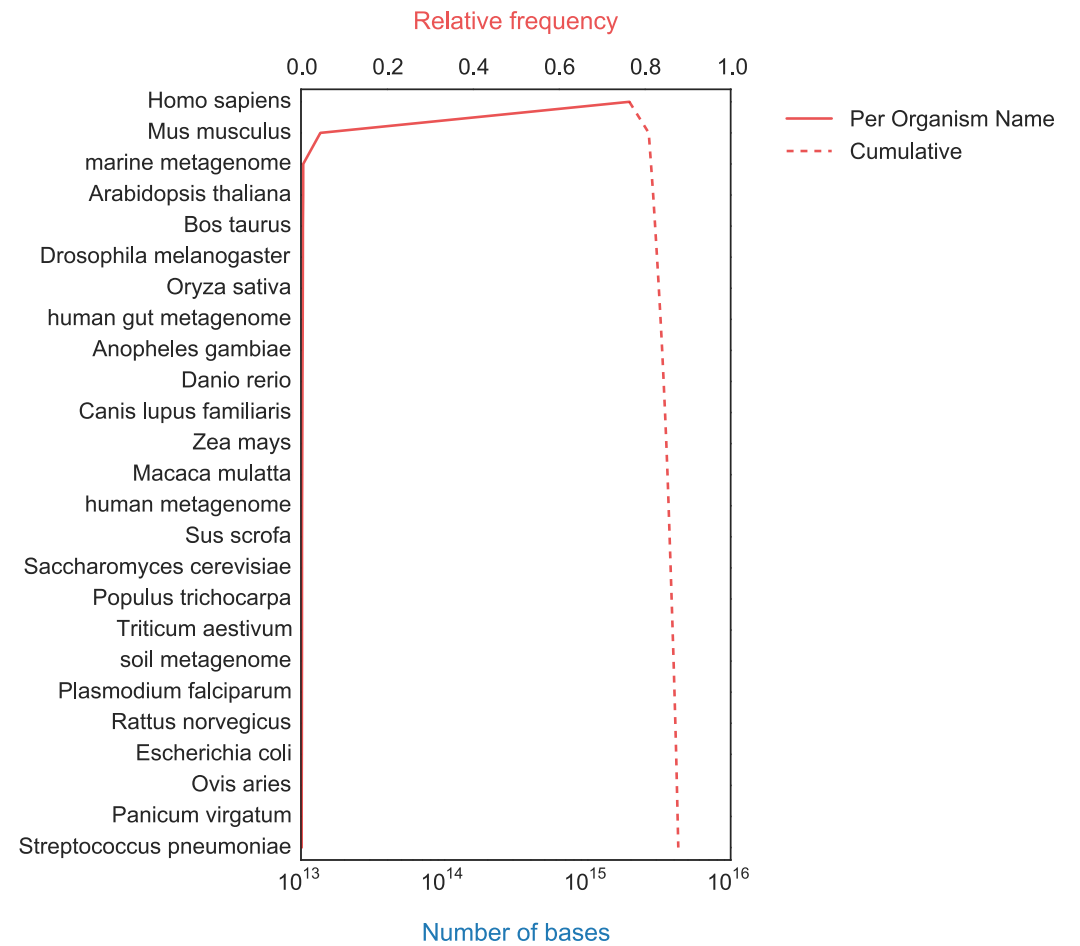

Supplement: Supplementary file [file 136358-2.pdf]
